# Supplementary material for: An epigenetic barrier sets the timing of human neuronal maturation
Source: Springer Nature journal article supplement (doi:10.1038/s41586-023-06984-8), 2024-01-31
Supplement: MOESM1 [file 41586_2023_6984_MOESM1_ESM.pdf]

---

**Supplementary information**

---

# **An epigenetic barrier sets the timing of human neuronal maturation**

---

In the format provided by the  
authors and unedited

# **An epigenetic barrier sets the timing of human neuronal maturation**

Gabriele Ciceri<sup>1\*</sup>, Arianna Baggiolini<sup>1,7</sup>, Hyein S. Cho<sup>2</sup>, Meghana Kshirsagar<sup>2,8</sup>, Silvia Benito-Kwiecinski<sup>1</sup>, Ryan M Walsh<sup>1</sup>, Kelly A Aromolaran<sup>3</sup>, Alberto J. Gonzalez-Hernandez<sup>4</sup>, Hermany Munguba<sup>4</sup>, So Yeon Koo<sup>1,6</sup>, Nan Xu<sup>1</sup>, Kaylin J. Sevilla<sup>1</sup>, Peter A Goldstein<sup>3</sup>, Joshua Levitz<sup>4</sup>,  
Christina S Leslie<sup>2,9</sup>, Richard P. Koche<sup>5,9</sup>, Lorenz Studer<sup>1\*</sup>

## **Affiliations:**

<sup>1</sup> The Center for Stem Cell Biology and Developmental Biology program; Memorial Sloan Kettering Cancer Center, New York, NY, USA

<sup>2</sup> Computational Biology Program, Memorial Sloan Kettering Cancer Center; New York, NY, USA

<sup>3</sup> Department of Anesthesiology, Weill Cornell Medicine; New York, NY, USA

<sup>4</sup> Department of Biochemistry, Weill Cornell Medicine, New York, NY, USA

<sup>5</sup> Center for Epigenetics Research, Memorial Sloan Kettering Cancer Center; New York, NY, USA

<sup>6</sup> Weill Cornell Neuroscience PhD program, New York, NY, USA

<sup>7</sup> Present address: Institute of Oncology Research (IOR), BIOS+, Bellinzona 6500, Switzerland & Università della Svizzera Italiana, Lugano 6900, Switzerland.

<sup>8</sup> Present address: Microsoft AI for Good research; Redmond, WA, USA

<sup>9</sup> These authors contributed equally to these work

\*Corresponding authors. Email: [studerl@mskcc.org](mailto:studerl@mskcc.org); [cicerig@mskcc.org](mailto:cicerig@mskcc.org)

## SI guide

|                                                                                                                                                             |         |
|-------------------------------------------------------------------------------------------------------------------------------------------------------------|---------|
| <b>Supplementary Figure 1.</b> Uncropped images for Western blots                                                                                           | page 1  |
| <b>Supplementary Figure 2.</b> Synchronized neurogenesis and long-term maintenance of cortical neurons generated from hPSCs                                 | page 5  |
| <b>Supplementary Figure 3.</b> Gene ontology and BrainSpan comparison for maturation -dependent upregulated transcripts                                     | page 6  |
| <b>Supplementary Figure 4.</b> Motif analysis for unbiased ATACseq clusters and pairwise comparisons of chromatin accessibility during neuronal maturation  | page 7  |
| <b>Supplementary Figure 5.</b> Gene ontology and BrainSpan comparison for maturation dependent downregulated transcripts                                    | page 8  |
| <b>Supplementary Figure 6.</b> Experimental strategy for gene knock-out in hPSCs-derived neurons                                                            | page 9  |
| <b>Supplementary Figure 7.</b> Representative WB and additional $\text{Ca}^{2+}$ imaging analysis for the loss-of-function of epigenetic factors in neurons | page 10 |
| <b>Supplementary Figure 8.</b> Generation of cortical neurons from mouse PSC                                                                                | page 11 |
| <b>Supplementary Figure 9.</b> Generation of CHD5 and JADE2 KO hPSC lines                                                                                   | page 12 |
| <b>Supplementary Table 1.</b> Electrophysiological properties of maturing hPSC-derived cortical neurons                                                     | page 13 |
| <b>Supplementary Table 2.</b> Additional statistical information of western blot analysis in loss-of-function experiments (Fig. 3d)                         | page 14 |
| <b>Supplementary Table 3.</b> Additional statistical information of $\text{Ca}^{2+}$ imaging analysis in loss-of-function experiments (Fig. 3e)             | page 15 |
| <b>Supplementary Table 4.</b> Sequence of customized qRT-PCR primers                                                                                        | page 16 |
| <b>Supplementary Table 5.</b> List of gRNA sequences used for gene KO in hPSC-derived neurons                                                               | page 17 |

### Supplementary Videos:

**Supplementary Video 1. Representative  $\text{Ca}^{2+}$  imaging for hPSC-derived cortical neurons at d40.** WA09 hPSC-derived cortical neurons were infected at d25 with lentiviruses encoding GCaMP6m and imaged at d40 of differentiation. Fluorescence was recorded every ~ 200 ms. Video displays 800 frames of imaging at 20 frames/second in one field of view.

**Supplementary Video 2. Representative  $\text{Ca}^{2+}$  imaging for hPSC-derived cortical neurons at d70.** WA09 hPSC-derived cortical neurons were infected at d25 with lentiviruses encoding GCaMP6m and imaged at d70 of differentiation. Fluorescence was recorded every ~ 200 ms. Video displays 800 frames of imaging at 20 frames/second in one field of view.

**Supplementary Video 3. Representative  $\text{Ca}^{2+}$  imaging for hPSC-derived cortical neurons derived from control (DMSO) treated NPC.** WA09 hPSC-derived cortical NPC were transiently treated with DMSO (0.04%) from d12 to d20. Neurons were infected at d25 with lentiviruses encoding GCaMP6m and imaged at d40 of differentiation. Fluorescence was recorded every ~ 200 ms. Video displays 800 frames of imaging at 20 frames/second in one field of view.

**Supplementary Video 4. Representative  $\text{Ca}^{2+}$  imaging for hPSC-derived cortical neurons derived from NPC treated with the EZH2 inhibitor.** WA09 hPSC-derived cortical NPC were transiently treated with GSK343 (4 $\mu\text{M}$ ) from d12 to d20. Neurons were infected at d25 with lentiviruses encoding GCaMP6m and imaged at d40 of differentiation. Fluorescence was recorded every ~ 200 ms. Video displays 800 frames of imaging at 20 frames/second in one field of view.

**Supplementary Video 5. Representative  $\text{Ca}^{2+}$  imaging for hPSC-derived cortical neurons derived from NPC treated with the EHMT1/2 inhibitor.** WA09 hPSC-derived cortical NPC were transiently treated with UNC0638 (4 $\mu\text{M}$ ) from d12 to d20. Neurons were infected at d25 with lentiviruses encoding GCaMP6m and imaged at d40 of differentiation. Fluorescence was recorded every ~ 200 ms. Video displays 800 frames of imaging at 20 frames/second in one field of view.

**Supplementary Video 6. Representative  $\text{Ca}^{2+}$  imaging for hPSC-derived cortical neurons derived from NPC treated with the DOT1L inhibitor.** WA09 hPSC-derived cortical NPC were transiently treated with EPZ004777 (4 $\mu\text{M}$ ) from d12 to d20. Neurons were infected at d25 with lentiviruses encoding GCaMP6m and imaged at d40 of differentiation. Fluorescence was recorded every ~ 200 ms. Video displays 800 frames of imaging at 20 frames/second in one field of view.

**Supplementary Video 7. Representative  $\text{Ca}^{2+}$  imaging of hPSC-derived cortical control organoids transiently treated with DMSO.** WA09 hPSC-derived cortical organoids were treated with 0.04% DMSO from d17 to d25 of differentiation, infected with lentiviruses encoding GCaMP6m at day45 and processed for light-sheet imaging at d55 of differentiation. Fluorescence was recorded at 5 frames/second. Video displays 600 frames of imaging at 100 frames/second in one field of view.

**Supplementary Video 8. Representative  $\text{Ca}^{2+}$  imaging of hPSC-derived cortical organoids transiently treated with the EZH2 inhibitor.** WA09 hPSC-derived cortical organoids were treated with GSK343 (4 $\mu\text{M}$ ) from d17 to d25 of differentiation, infected with lentiviruses encoding GCaMP6m at day45 and processed for light-sheet imaging at d55 of differentiation. Fluorescence was recorded at 5 frames/second. Video displays 600 frames of imaging at 100 frames/second in one field of view.



From Extended Data Fig. 4a

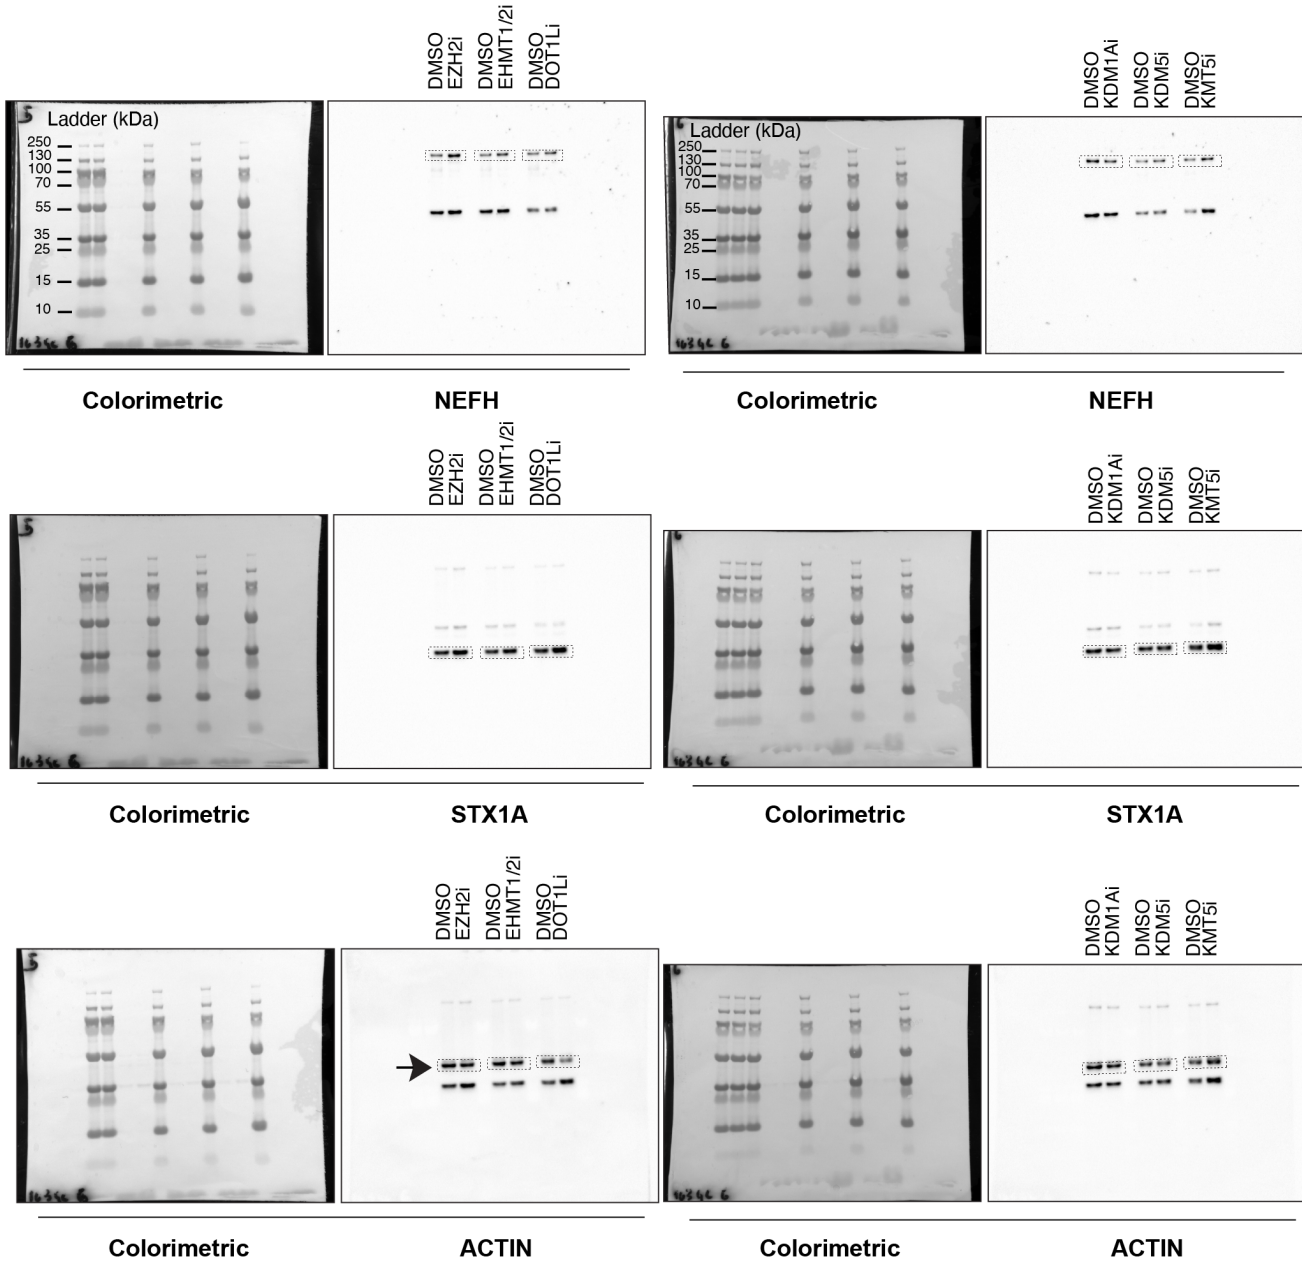

From Supplementary Figure 6

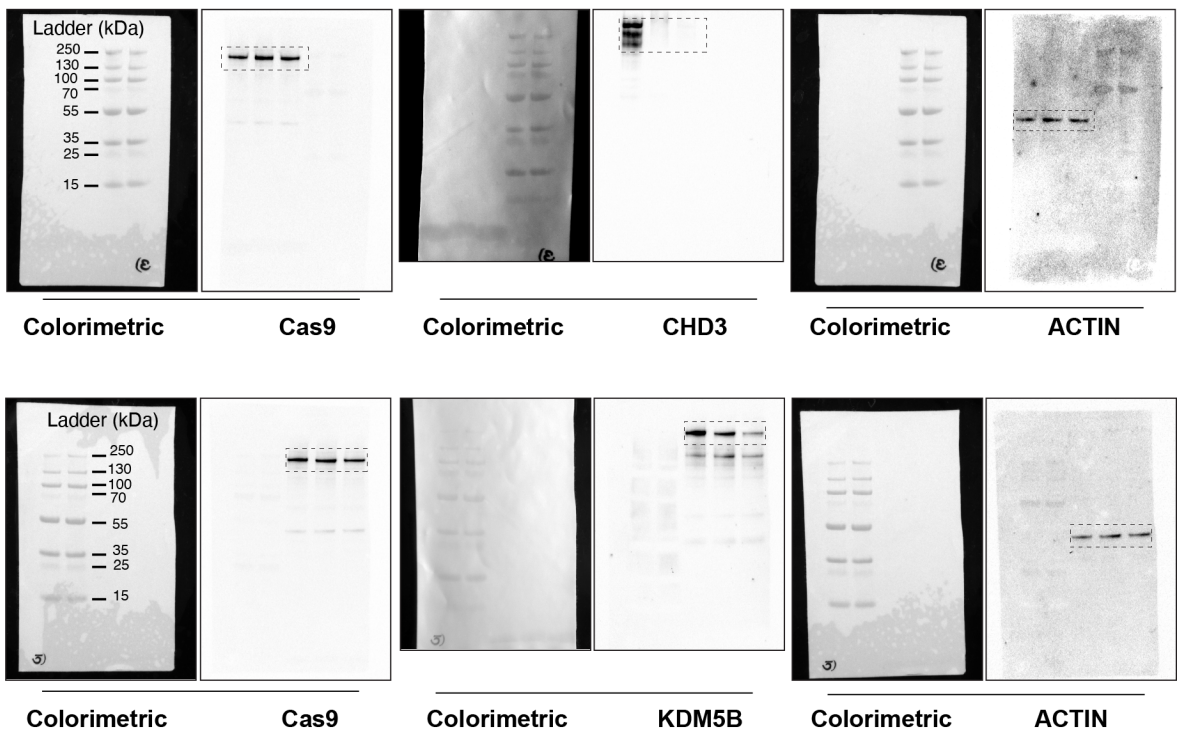

From Supplementary Figure 7 (top left)

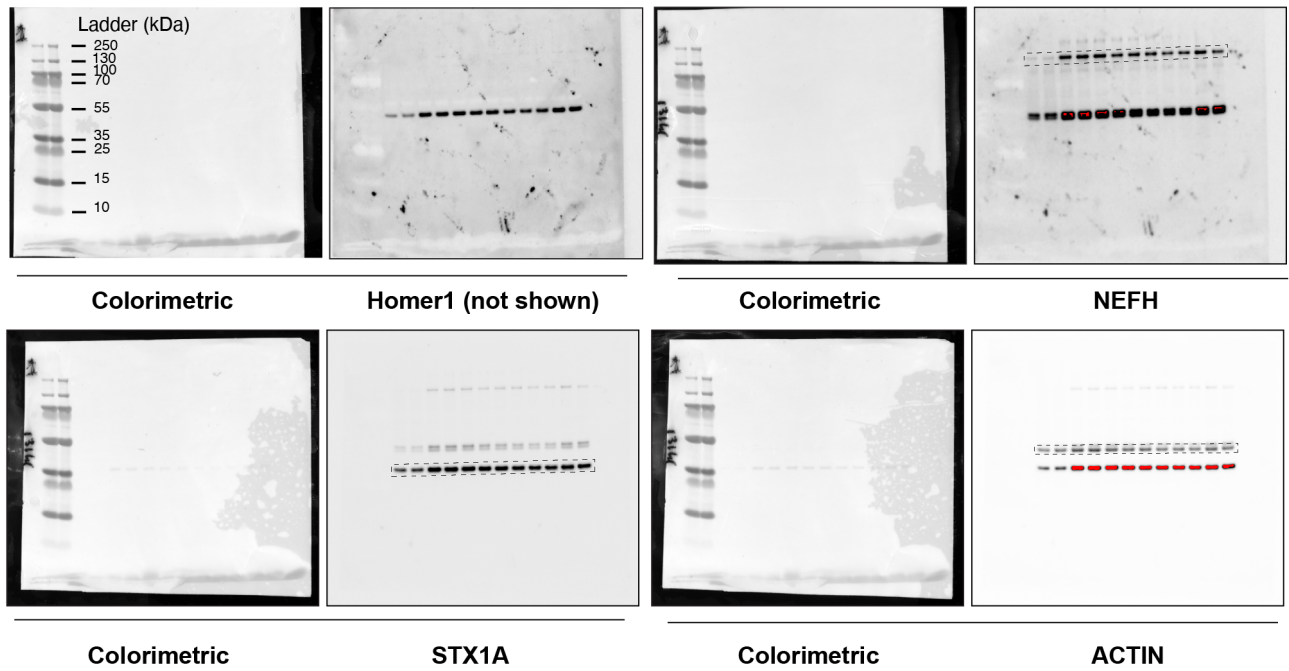

From Supplementary Figure 7 (top right)

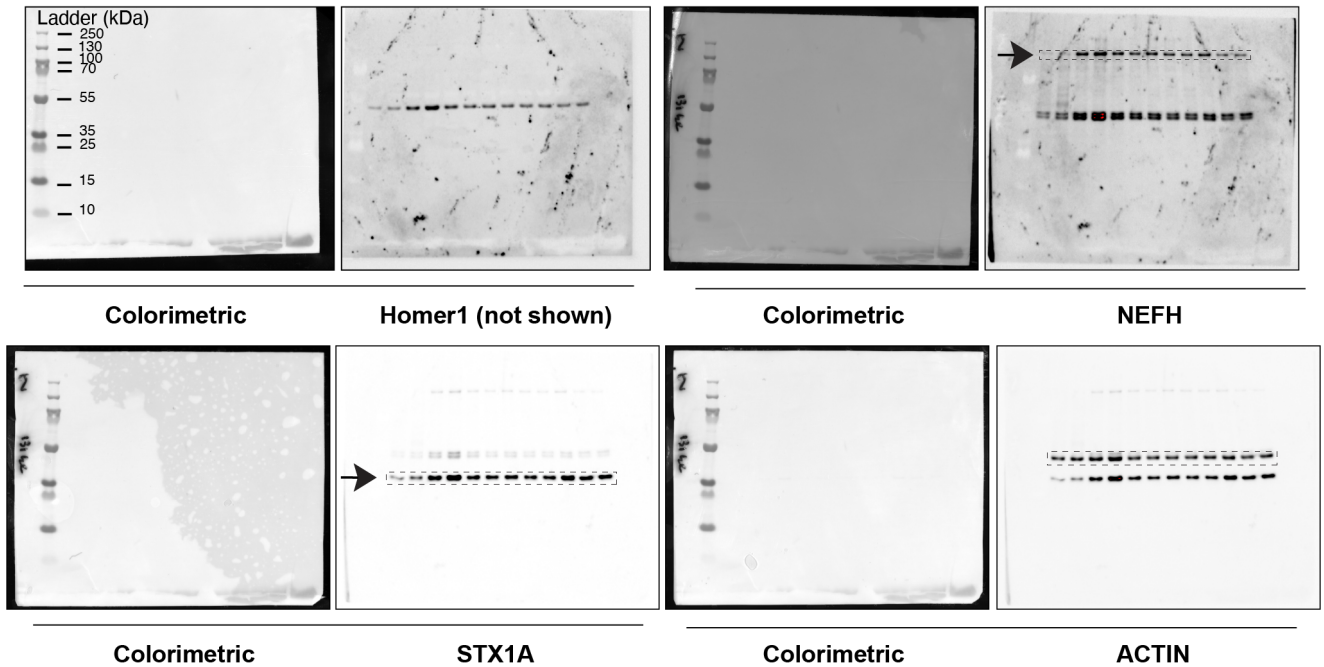

From Supplementary Figure 7 (bottom left)

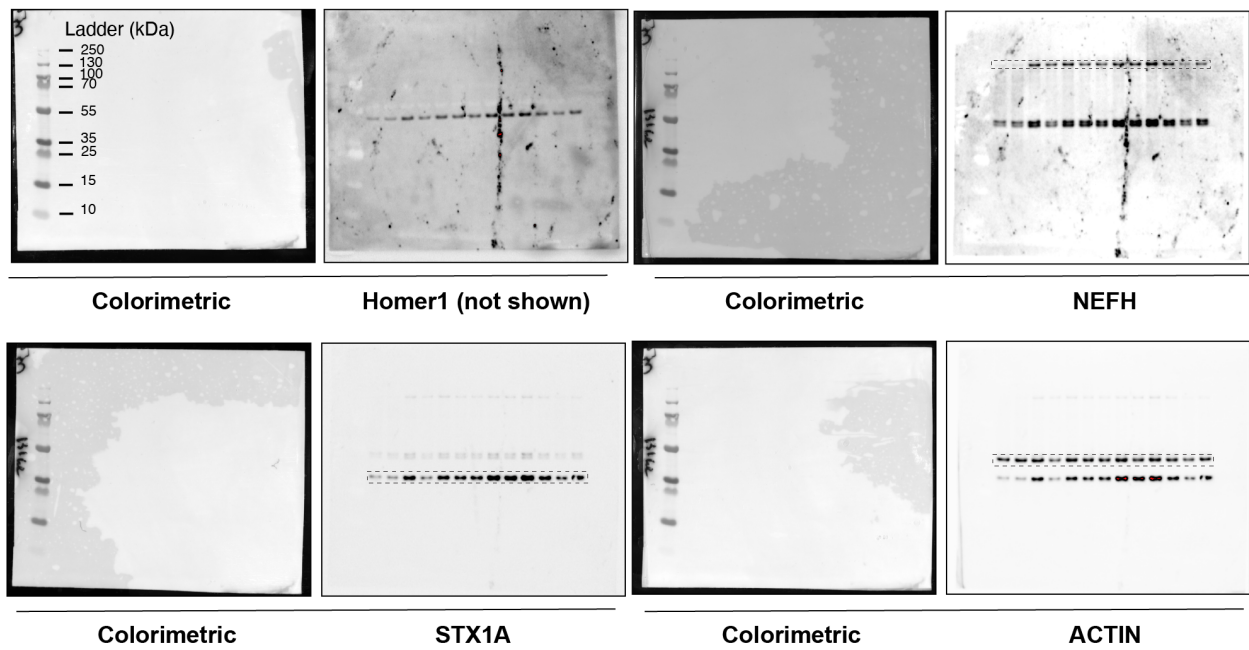

From Supplementary Figure 7 (bottom right)

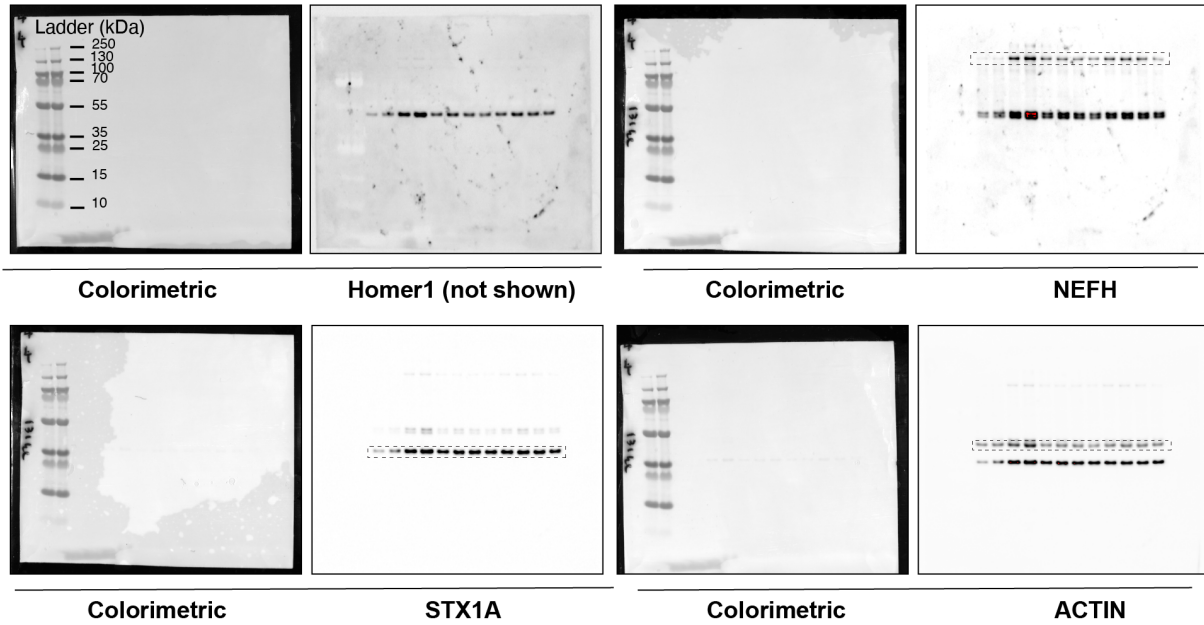

Supplementary Figure 1. Uncropped images for Western blots

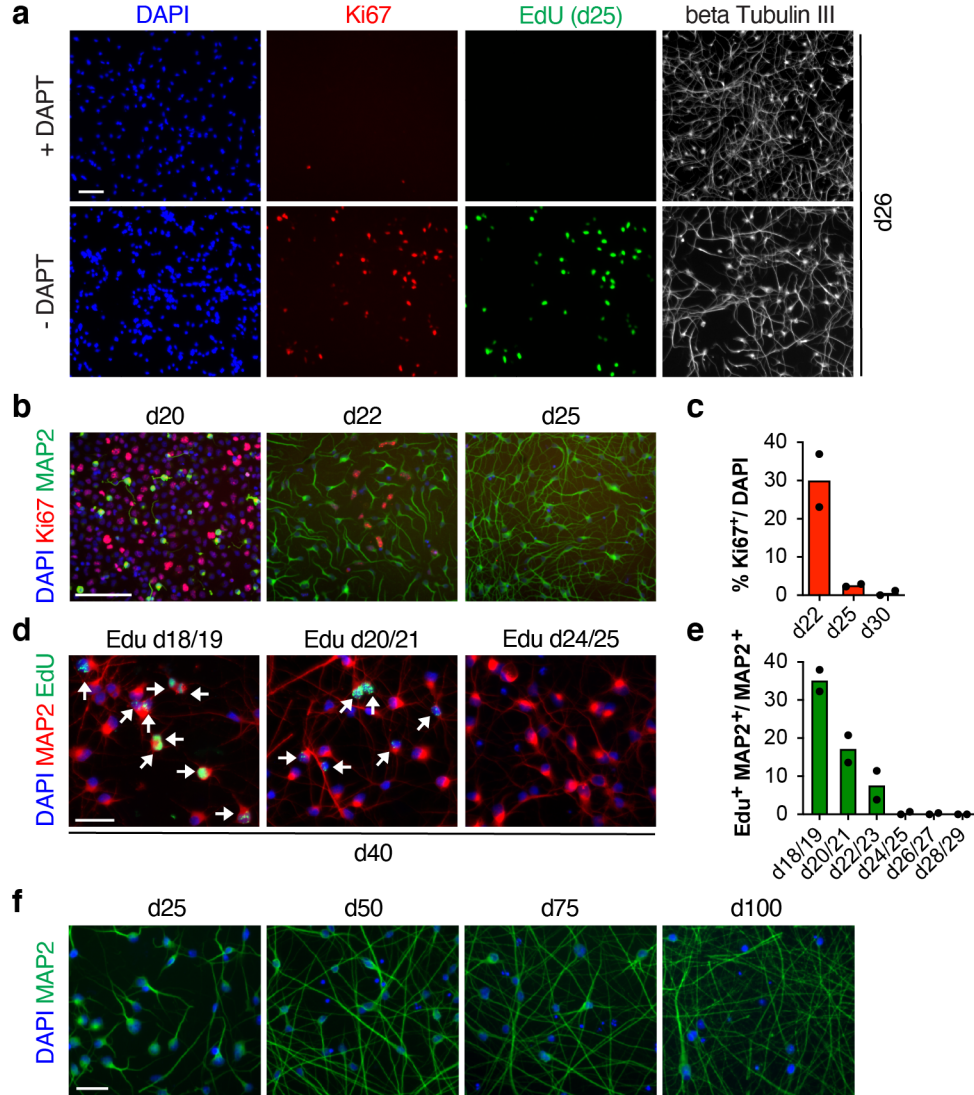

**Supplementary Figure 2. Synchronized neurogenesis and long-term maintenance of cortical neurons generated from hPSCs.** **a**, Cell passaging at low density and DAPT treatment rapidly deplete the pool of progenitor cells. Cells were culture in presence or absence of DAPT from d20, pulse labelled with EdU for 24h at d25 and analyzed at d26 by immunostaining for EdU, KI67 and MAP2. **b-c**, Representative images (b) and quantification (c) of percentage of MKI67<sup>+</sup> NPC and MAP2<sup>+</sup> neurons after the induction of synchronized neurogenesis at d20 (n = 2 independent experiments). **d-e**, Representative images (d) and quantification (e) of the fraction of d40 MAP2 neurons that were labelled by EdU pulses of progenitor cells at the indicated days (n = 2 independent experiments). **f**, Synchronized cortical neurons can be maintained at high viability in long-term cultures. Representative images of cortical neurons stained with antibody against MAP2 at day25, 50, 75 and 100 of differentiation. Histograms depict mean. Scale bars are 100  $\mu$ m (a,b); 50  $\mu$ m (d,f).



**a**

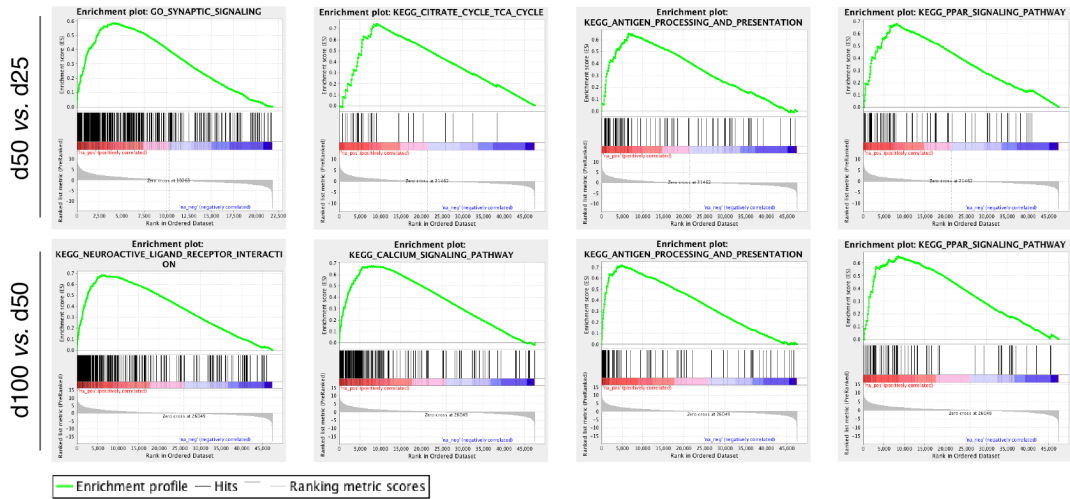

**b**

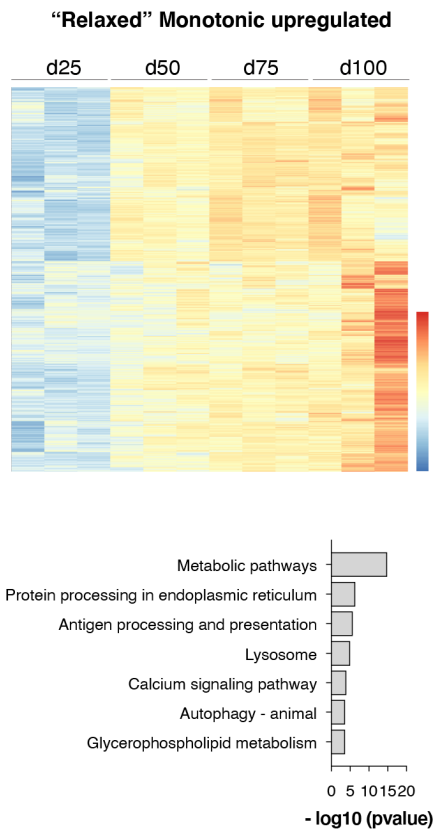

**c**

### BrainSpan Atlas - Primary Visual Cortex (V1C)

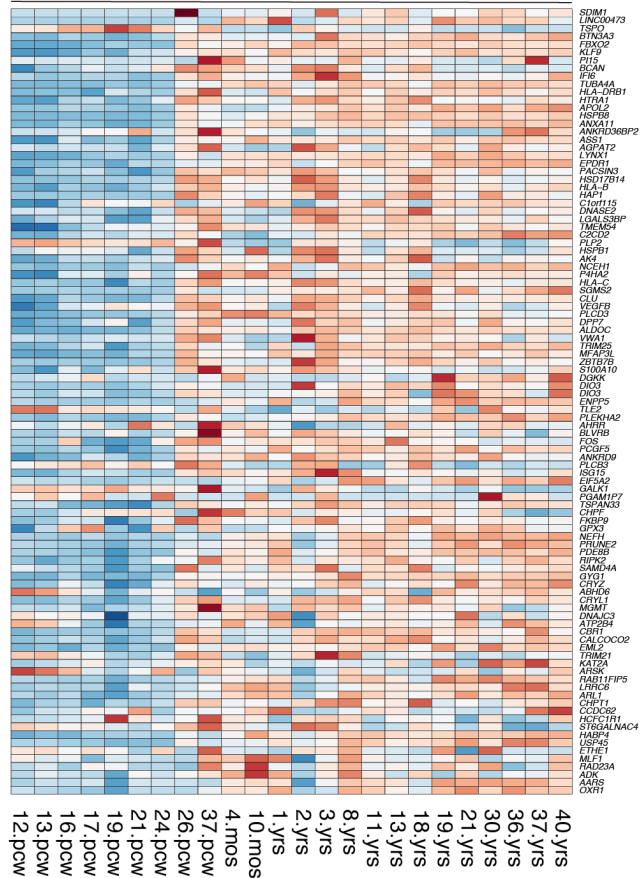

**Supplementary Figure 3. Gene ontology and BrainSpan comparison for maturation dependent upregulated transcripts.** **a**, GSEA plots for some of the GO terms from RNAseq studies (n = 3 independent experiments) that positively correlate with neuronal maturation in d50 vs. d25 and d100 vs. d50 pairwise comparisons. **b**, Heatmap for the normalized temporal expression of “relaxed” monotonically upregulated transcripts during neuronal maturation (top) and GO for KEGG pathways (bottom). **c**, Heatmap for the normalized temporal expression of the corresponding monotonically upregulated transcripts in the BrainSpan atlas of the developing human brain (primary visual cortex) shown in Fig. 2c. Fisher's Exact test (b).

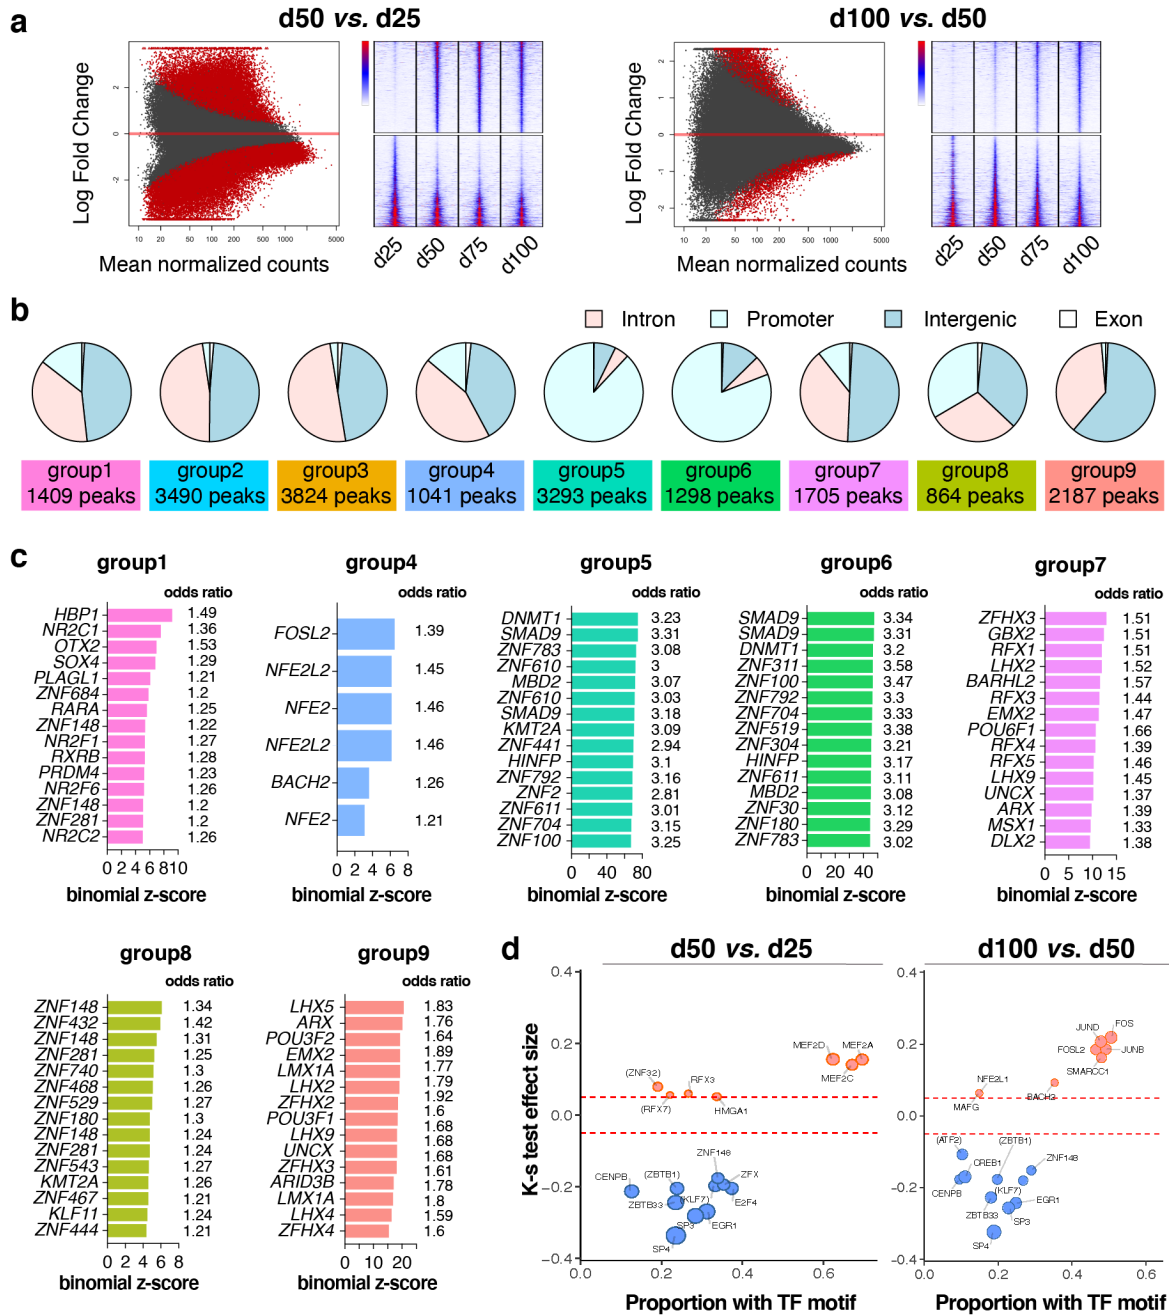

**Supplementary Figure 4. Motif analysis for unbiased ATACseq clusters and pairwise comparisons of chromatin accessibility during neuronal maturation.** **a**, MA (left) and tornado plots (right) for differentially accessible ATACseq peaks in d25 vs. d50 and d50 vs. d100 pairwise comparisons. **b**, Pie charts of ATACseq peaks mapped to gene promoters, introns, exons, and intergenic genomic regions for each of the cluster in Fig. 2f. **c**, Top transcription factor motifs enriched by the hypergeometric test in the indicated groups of ATACseq peaks. Odds ratio indicates the normalized enrichment of transcription factor motifs in the cluster compared to the background. **d**, Top transcription factor motifs enriched in differentially accessible ATACseq peaks in d50 vs. d25 and d100 vs. d50 pairwise comparisons. (a-d) Analysis derived from ATACseq dataset originated from  $n = 2$  independent experiments.

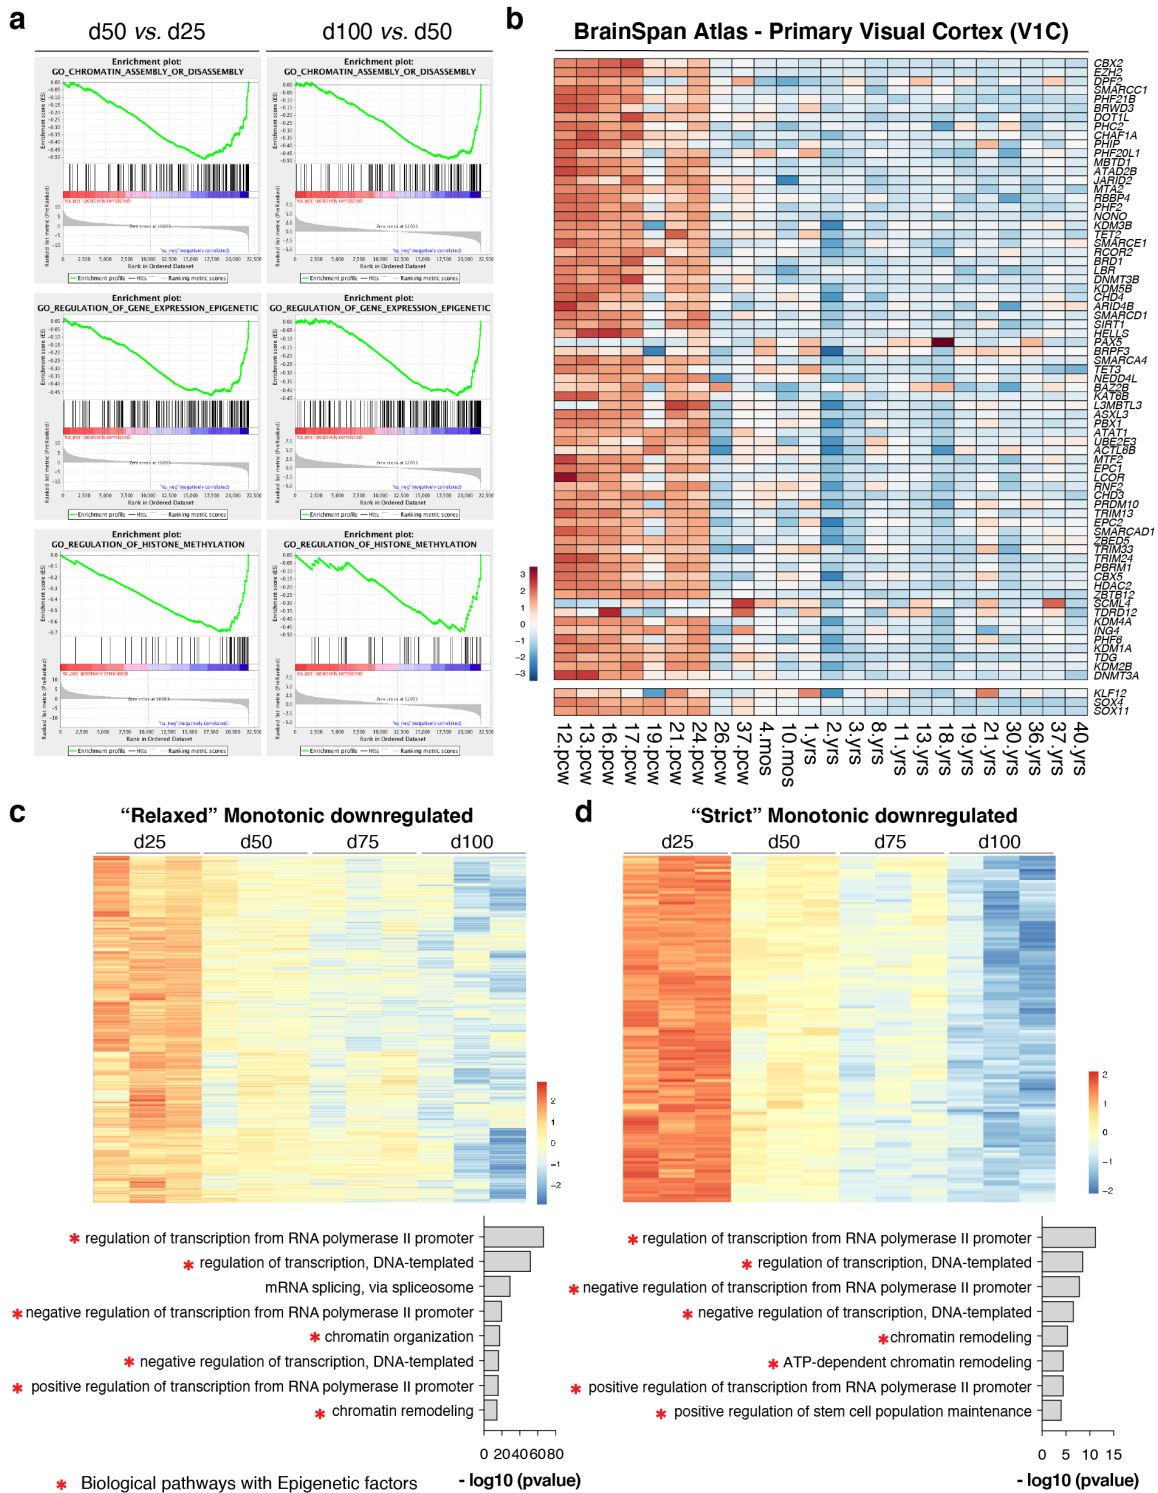

**Supplementary Figure 5. Gene ontology and BrainSpan comparison for maturation dependent downregulated transcripts.** **a**, GSEA plots for some of the GO terms from RNAseq studies ( $n = 3$  independent experiments) related to chromatin remodeling in d50 vs. d25 and d100 vs. d50 pairwise comparisons. **b**, Heatmap for the normalized temporal expression of the corresponding monotonically downregulated chromatin regulators in the BrainSpan atlas of the developing human brain (primary visual cortex) shown in Fig. 3b. **c**, Heatmap for the normalized temporal expression of “relaxed” monotonically downregulated transcripts during neuronal maturation (top) and GO for biological pathways (bottom). **d**, Heatmap for the normalized temporal expression of “strict” monotonically downregulated transcripts during neuronal maturation (top) and GO for biological pathways (bottom). Fisher's Exact test (c, d).



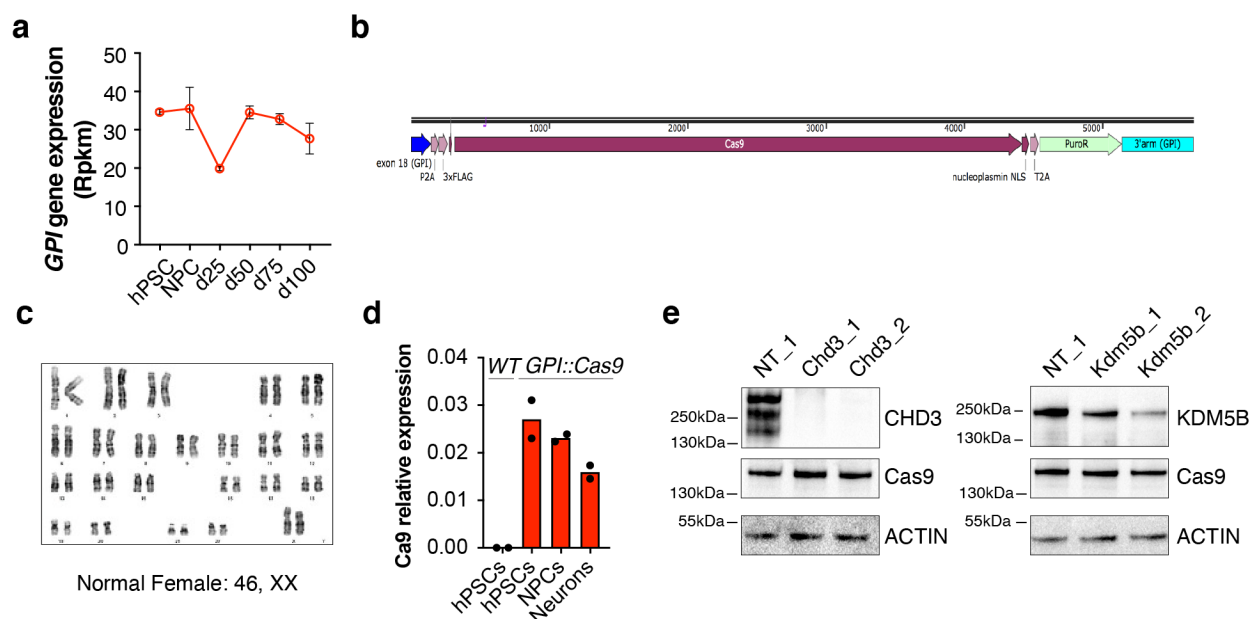

**Supplementary Figure 6. Experimental strategy for gene knock-out in hPSCs-derived neurons.** **a**, Expression of *GPI* gene throughout the differentiation (n = 3 independent experiments). **b**, Schematic for the targeting construct used for the generation of the GPI::Cas9 knock-in hPSCs line. Cas9 is linked to the GPI gene via 2A self-cleaving peptide sequence. **c**, Karyotypic analysis of the GPI::Cas9 hPSCs clonal cell line used for the study. **d**, Expression of Cas9 mRNA in the GPI::Cas9 line at hPSC, NPC and neuron stages compared to wild type hPSC (n = 2 independent experiments). **e**, Representative Western Blot analysis for CRISPR/Cas9-based gene KO for CHD3 and KDM5B in neurons using the same strategy shown in Fig. 3c. Cas9 expressing neurons at d25 were infected with lentiviral vectors encoding non-targeting and gene-specific gRNAs and analyzed at day35 of differentiation. Data is depicted as mean  $\pm$  s.e.m.



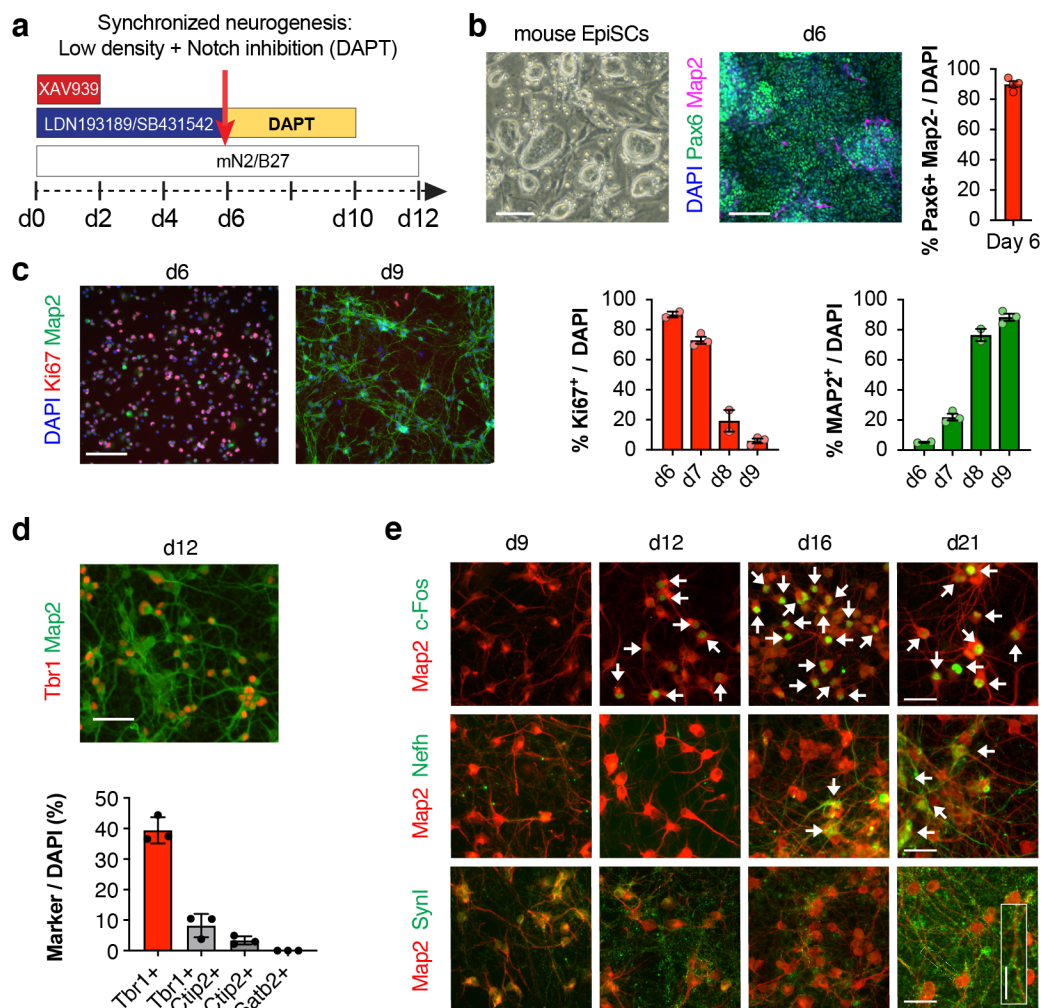

**Supplementary Figure 8. Generation of cortical neurons from mouse PSC.** **a**, Schematics of the differentiation protocol of mouse epiblast stem cells (mEpiSC) based on dual-SMAD and WNT inhibition. The panel indicate differentiation days, basal media, and small molecules treatments. The red arrow indicates cell-passaging at low density in presence of notch pathway inhibitor DAPT. **b**, Representative images of mEpiSC colonies using MEF feeders (left) and cultures at d6 stained with the forebrain progenitor cell marker Pax6 and the neuron marker MAP2 (middle). Quantification of the fraction of cells expressing Pax6 is shown on the right ( $n = 4$  independent experiments). **c**, Representative images (left) and quantification (right) of the percentage of Mki67<sup>+</sup> NPC and Map2<sup>+</sup> neurons after the induction of synchronized neurogenesis at d6. d6  $n = 2$ , d7  $n = 3$ , d8  $n = 2$ , d9  $n = 3$  (independent experiments). **d**, Representative images of neuronal cultures stained for Map2 and Tbr1 (top) and quantification (bottom) of the fraction of neurons generated through synchronized neurogenesis and expressing Tbr1, Ctip2 and Satb2 neuron markers ( $n = 3$  independent experiments). **e**, Representative images of neurons at indicated time-points stained with antibodies for indicated maturation markers. Histograms depict mean  $\pm$  s.e.m. Scale bars are 100  $\mu$ m (b, c); 50  $\mu$ m (d, e).

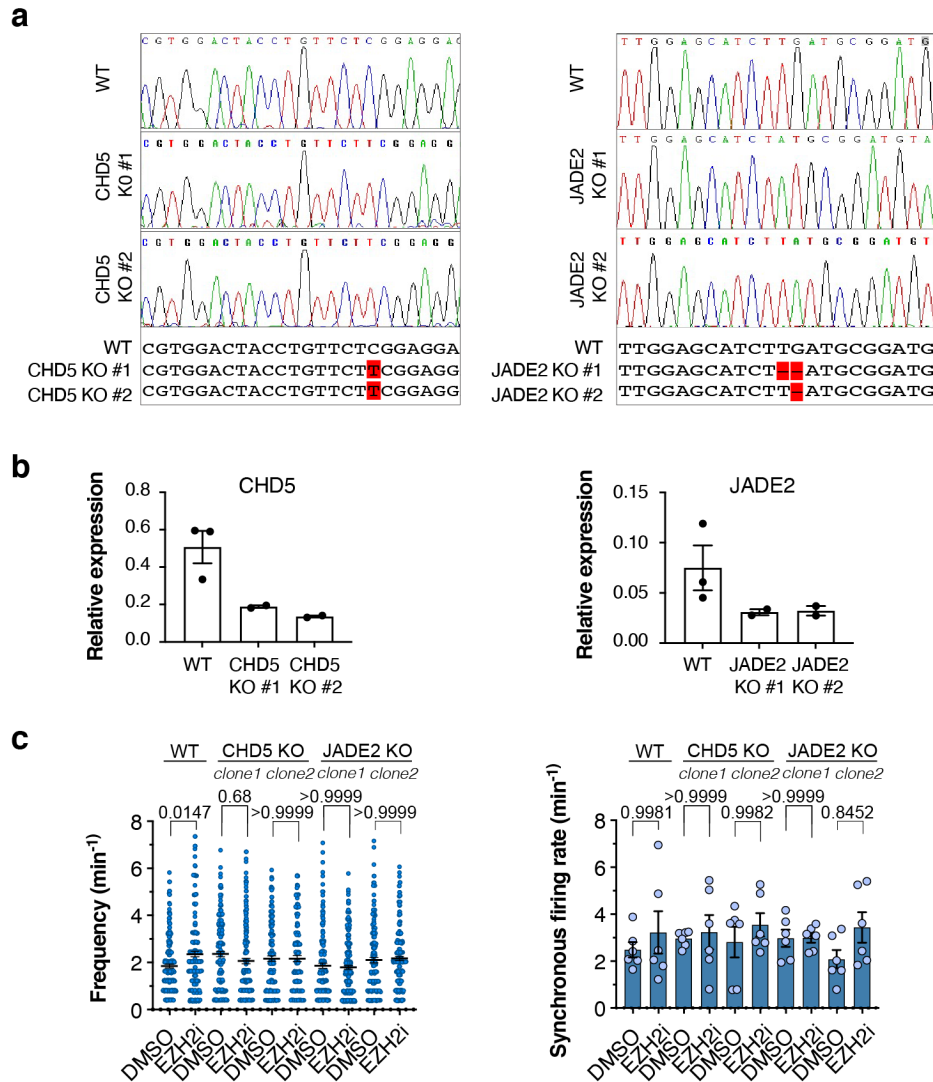

**Supplementary Figure 9. Generation of CHD5 and JADE2 KO hPSC lines:** **a**, Sanger sequencing for the verification of indel mutations into the genomic sequence of CHD5 and JADE2 genes following CRISPR/Cas9 genomic targeting. Red boxes identify indels. **b**, qRT-PCR expression of *CHD5* and *JADE2* in hPSC-derived neurons at d35 of differentiation. Left: WT  $n = 3$ , CHD5 KO#1 and #2  $n = 2$ ; Right: WT  $n = 3$ , JADE2 KO#1 and #2  $n = 2$  (independent experiments). **c**, Frequency of spontaneous  $\text{Ca}^{2+}$  spikes of individual neurons (left) and synchronicity rate of spontaneous network activity (right) in hPSC-derived neurons from indicated genotype at d40 of differentiation. Frequency. DMSO:  $n = 241$  (WT),  $n = 184$  (CHD5-KO#1),  $n = 165$  (CHD5-KO#2),  $n = 183$  (JADE2-KO#1),  $n = 171$  (JADE2-KO#2); EZH2i  $n = 190$  (WT),  $n = 197$  (CHD5-KO#1),  $n = 147$  (CHD5-KO#2),  $n = 222$  (JADE2-KO#1),  $n = 213$  (JADE2-KO#2) neurons from 2 independent experiments. Synchronous firing rate.  $n = 6$  field of view from 2 independent experiments. Welch's one-way ANOVA with Games-Howell's correction (c, left); ordinary one-way ANOVA with Dunnett's multiple comparison test (c, right). Histograms and lines depict mean  $\pm$  s.e.m.

|                               | <b>day 25</b> | <b>day 50</b> | <b>day 75</b> | <b>day 100</b> |
|-------------------------------|---------------|---------------|---------------|----------------|
| <b>RMP (mV)</b>               | -36.7±2.0     | -50.2±1.2     | -52.3±1.1     | -51.6±1.4      |
| <b>IR (MΩ)</b>                | 1,601.5±100.9 | 731.4±53.3    | 646.0±48.6    | 518.5±65.9     |
| <b>Rheobase (pA)</b>          | 98.8±8.5      | 32.7±6.5      | 36.0±4.7      | 29.7±4.5       |
| <b>APT (mV)</b>               | -8.8±2.4      | -31.5±1.2     | -30.1±1.0     | -34.5±1.0      |
| <b>APA (mV)</b>               | 25.1±1.3      | 48.2±3.1      | 53.1±1.8      | 59.1±2.3       |
| <b>APD (ms)</b>               | 23.9±2.1      | 14.1±1.4      | 10.0±1.0      | 9.5±0.7        |
| <b>AHP (ms)</b>               | 12.0±1.2      | 6.0±0.7       | 4.0±0.3       | 3.5±0.2        |
| <b>Rise time (ms)</b>         | 5.5±0.5       | 2.5±0.3       | 1.7±0.2       | 1.6±0.2        |
| <b>Decay time (ms)</b>        | 9.6±0.9       | 7.3±1.0       | 4.3±0.5       | 4.1±0.3        |
| <b>Rise slope (mV/ms)</b>     | 4.4±0.8       | 29.7±4.3      | 39.8±4.0      | 42.4±4.3       |
| <b>Decay slope (mV/ms)</b>    | -2.9±0.7      | -9.9±1.4      | -14.2±1.3     | -13.7±1.1      |
| <b>Cm (pF)</b>                | 21.2±1.6      | 28.3±1.9      | 35.2±2.0      | 31.6±1.9       |
| <b>Rm (MΩ)</b>                | 505.2±61.6    | 192.0±20.0    | 144.8±8.7     | 143.6±13.5     |
| <b>Access resistance (MΩ)</b> | 39.8±2.6      | 42.9±2.3      | 36.5±1.9      | 39.6±1.7       |
| <b>n</b>                      | 25            | 33            | 43            | 29             |

**Supplementary Table 1. Electrophysiological properties of maturing hPSC-derived cortical neurons.** Quantification of the electrophysiological properties of hPSC-derived neurons at day 25, 50, 75, 100 of differentiation. Results are displayed as mean ± s.e.m. RMP, Resting membrane potential; IR, Input resistance, APT, Action potential threshold; APA, Action potential amplitude; APD, Action potential duration at its half amplitude; AHP, After hyperpolarization amplitude; Cm, Membrane capacitance; Rm, Membrane resistance.

| Gene Target | P value (NEFH) | t-value; df (NEFH) | gRNA_1 n | gRNA_2 n | Alpha | P value (STX1A) | t-value; df (STX1A) | gRNA_1 n | gRNA_2 n | Alpha |
|-------------|----------------|--------------------|----------|----------|-------|-----------------|---------------------|----------|----------|-------|
| CBX5        | 0.0016         | t=6.238, df=5      | 3        | 3        | 0.05  | 0.019           | t=3.410, df=5       | 3        | 3        | 0.05  |
| RNF2        | 0.0043         | t=4.452, df=6      | 3        | 4        | 0.05  | 0.0008          | t=6.168, df=6       | 3        | 4        | 0.05  |
| EPC1        | 0.0042         | t=4.160, df=7      | 4        | 4        | 0.05  | 0.0821          | t=2.309, df=4       | 2        | 3        | 0.05  |
| EPC2        | 0.0007         | t=5.766, df=7      | 4        | 4        | 0.05  | 0.0121          | t=3.844, df=5       | 3        | 3        | 0.05  |
| EZH2        | 0.0019         | t=4.833, df=7      | 4        | 4        | 0.05  | 0.0003          | t=7.295, df=6       | 4        | 3        | 0.05  |
| MTF2        | 0.0034         | t=4.339, df=7      | 4        | 4        | 0.05  | 0.0036          | t=5.165, df=5       | 3        | 3        | 0.05  |
| CHD3        | 0.006          | t=4.565, df=5      | 3        | 3        | 0.05  | 0.0025          | t=5.581, df=5       | 3        | 3        | 0.05  |
| MTA2        | 0.0003         | t=9.005, df=5      | 3        | 3        | 0.05  | <0.0001         | t=13.75, df=5       | 3        | 3        | 0.05  |
| RBBP4       | 0.0014         | t=6.379, df=5      | 3        | 3        | 0.05  | 0.0017          | t=6.107, df=5       | 3        | 3        | 0.05  |
| KDM1A       | 0.0098         | t=4.048, df=5      | 3        | 3        | 0.05  | 0.0009          | t=5.137, df=8       | 5        | 4        | 0.05  |
| KDM5B       | 0.0156         | t=3.598, df=5      | 3        | 3        | 0.05  | <0.0001         | t=13.39, df=6       | 3        | 4        | 0.05  |
| KMT5B       | 0.007          | t=4.406, df=5      | 3        | 3        | 0.05  | 0.0003          | t=7.380, df=6       | 3        | 4        | 0.05  |
| HDAC2       | 0.0061         | t=4.560, df=5      | 3        | 3        | 0.05  | 0.0102          | t=3.687, df=6       | 3        | 4        | 0.05  |
| RCOR2       | 0.0551         | t=3.058, df=3      | 2        | 2        | 0.05  | 0.0606          | t=2.413, df=5       | 3        | 3        | 0.05  |
| SMARCE1     | <0.0001        | t=43.44, df=3      | 2        | 2        | 0.05  | 0.0076          | t=4.976, df=4       | 3        | 2        | 0.05  |
| SMARCA4     | <0.0001        | t=32.47, df=3      | 2        | 2        | 0.05  | 0.0118          | t=4.393, df=4       | 2        | 3        | 0.05  |
| SMARCA4     | <0.0001        | t=40.26, df=3      | 2        | 2        | 0.05  | 0.0015          | t=6.246, df=5       | 3        | 3        | 0.05  |
| BRD1        | 0.0003         | t=9.151, df=5      | 3        | 3        | 0.05  | 0.0141          | t=3.690, df=5       | 3        | 3        | 0.05  |
| SOX4        | 0.0024         | t=5.654, df=5      | 3        | 3        | 0.05  | 0.0042          | t=4.972, df=5       | 3        | 3        | 0.05  |
| SOX11       | 0.0025         | t=5.628, df=5      | 3        | 3        | 0.05  | 0.0013          | t=6.457, df=5       | 3        | 3        | 0.05  |
| KLF12       | 0.0095         | t=4.088, df=5      | 3        | 3        | 0.05  | 0.0162          | t=3.993, df=4       | 3        | 2        | 0.05  |

**Supplementary Table 2. Additional statistical information of western blot analysis in loss-of-function experiments (Fig. 3d)**

| Gene Target | n   |
|-------------|-----|
| NT1         | 195 |
| NT2         | 245 |
| BRD1        | 295 |
| CBX5        | 352 |
| CHD3        | 246 |
| EPC1        | 291 |
| EPC2        | 271 |
| EZH2        | 343 |
| HDAC2       | 227 |
| KDM1A       | 146 |
| KDM5B       | 228 |
| KMT5B       | 157 |
| MTA2        | 308 |
| MTF2        | 191 |
| RBBP4       | 310 |
| RNF2        | 121 |
| SMARCA4     | 238 |
| SMARCE1     | 258 |
| SMARCAD1    | 307 |
| RCOR2       | 408 |
| SOX4        | 243 |
| SOX11       | 251 |
| KLF12       | 205 |

| Comparison       | p value |
|------------------|---------|
| NT2 vs. BRD1     | <0.0001 |
| NT2 vs. CBX5     | <0.0001 |
| NT2 vs. CHD3     | <0.0001 |
| NT2 vs. EPC1     | <0.0001 |
| NT2 vs. EPC2     | <0.0001 |
| NT2 vs. EZH2     | 0.0005  |
| NT2 vs. HDAC2    | >0.9999 |
| NT2 vs. KDM1A    | 0.5249  |
| NT2 vs. KDM5B    | 0.9339  |
| NT2 vs. KMT5B    | <0.0001 |
| NT2 vs. MTA2     | 0.8012  |
| NT2 vs. MTF2     | 0.0213  |
| NT2 vs. RBBP4    | 0.9559  |
| NT2 vs. RNF2     | <0.0001 |
| NT2 vs. SMARCA4  | 0.0009  |
| NT2 vs. SMARCE1  | 0.1523  |
| NT2 vs. SMARCAD1 | 0.0003  |
| NT2 vs. RCOR2    | 0.5868  |
| NT2 vs. SOX4     | 0.9997  |
| NT2 vs. SOX11    | >0.9999 |
| NT2 vs. KLF12    | 0.0101  |
| NT2 vs. NT1      | 0.9528  |

**Supplementary Table 3. Additional statistical information of Ca<sup>2+</sup> imaging analysis in loss-of-function experiments (Fig. 3e)**

| Gene name            | Forward                  | Reverse                  |
|----------------------|--------------------------|--------------------------|
| <b>DOT1L (human)</b> | CTGCCGGTCTACGATAAACATC   | AGCTTGAGATCCGGGATTCT     |
| <b>EHMT1 (human)</b> | CATGCAGCCAGTAAAGATCCC    | CTGCTGTCGTCCAAAGTCAG     |
| <b>KDM5B (human)</b> | AGTGGGCTCACATATCAGAGG    | CAAACACCTTAGGCTGTCTCC    |
| <b>KMT5B (human)</b> | AGGACAGAGTCGCTATGTACC    | CAAACCTGGTTGCTAGGTCATCAT |
| <b>CHD5 (human)</b>  | GAATGACCCACGGTACATGA     | CCCTTGTGGACCTCAGACTT     |
| <b>JADE2 (human)</b> | ATCGAGTACGACGAGGATGTT    | CACACAGACGTTGCACTTGTC    |
| <b>Ezh2 (mouse)</b>  | CATACGCTCTTCTGTGACGATG   | ACACTGTGGTCCACAAGGCTTG   |
| <b>Tbp (mouse)</b>   | CTACCGTGAATCTTGGCTGTAAAC | AATCAACGCAGTTGTCCGTGGC   |
| <b>Chd5 (mouse)</b>  | TGCAACCATCCGTACCTCTTCC   | TCAGCACTCTGTGCCCTTCATC   |
| <b>Syn1 (mouse)</b>  | TATGCCACTGCTGAGCCCTTCA   | ATGGCAATCTGCTCAAGCATAGC  |
| <b>Fos (mouse)</b>   | GGGAATGGTGAAGACCGTGTCA   | GCAGCCATCTTATTCCGTTCCC   |
| <b>SynI (mouse)</b>  | TATGCCACTGCTGAGCCCTTCA   | ATGGCAATCTGCTCAAGCATAGC  |
| <b>Pgc1a (mouse)</b> | GAATCAAGCCACTACAGACACCG  | CATCCCTCTTGAGCCTTTCGTG   |

**Supplementary Table 4. Sequence of customized qRT-PCR primers.**



| <b>gRNA ID</b> | <b>gRNA Target sequence</b> |
|----------------|-----------------------------|
| NT1            | AAAAAGCTTCCGCCTGATGG        |
| NT2            | CATAGGTCCCTAGCAACTCC        |
| BRD1#1         | AAATAGGATTGCGAATCAGG        |
| BRD1#2         | AAACTGCTTCTTCCGCTGAA        |
| CBX5#1         | TACCCAGGGAGCACAATACT        |
| CBX5#2         | TAAATTCAGAAATTAGCTCA        |
| CHD3#1         | GCAACTCTGCTTCTGACCTG        |
| CHD3#2         | GGAGCATGTGTTCTCTGAGG        |
| EPC1#1         | TTAGGAACATCATCTTCAG         |
| EPC1#2         | GCGGGCTATTCAGCACAGC         |
| EPC2#1         | TTGACGTTGCTCTCTGCCTC        |
| EPC2#2         | TATTACAATCGCTTGTACAA        |
| EZH2#1         | CGGAAATCTTAAACCAAGAA        |
| EZH2#2         | GCAATGAGCTCACAGAAGTC        |
| HDAC2#1        | TGGGTCATGCGGATTCTATG        |
| HDAC2#2        | ACAGCAAGTTATGGGTCATG        |
| KDM1A#1        | ATACTCATCTTCTGAGAGGT        |
| KDM1A#2        | ACCCCTCAAGCCCCACCTG         |
| KDM5B#1        | ACTCCCAGTACTTTGCAATC        |
| KDM5B#2        | GCAAAGTACTGGGAGTTACA        |
| KMT5B#1        | TTTCACAGGTAATGGTAACT        |
| KMT5B#2        | AGTCGCTATGTACCATCCTC        |
| MTA2#1         | GCGCCATCAACTGAAGCACC        |
| MTA2#2         | GAAGAGGAATCAAAGCAGCC        |
| MTF2#1         | TGATTGATTCAGATGAAAAA        |
| MTF2#2         | CAGATGAAAAATGGCTCTGT        |
| RBBP4#1        | TCATGTACCTGGTTACATC         |
| RBBP4#2        | ATTGCCGTTACAGACCAGAA        |
| RNF2#1         | ATCATCACAGCCCTTAGAAG        |
| RNF2#2         | AATTCAGTGTAGACTTCG          |
| SMARCA4#1      | ATGGTCCCTCTCGCAGCCCA        |
| SMARCA4#2      | CTTTCATCTGGTTGTAGCGC        |
| SMARCE1#1      | CAGCAAATGCCCAGCACACC        |
| SMARCE1#2      | TCCTACCGTGACCCGGCTGT        |
| SMARCA4#1      | AACTGTATTGGAGCAATTTG        |
| SMARCA4#2      | GAAGTGTATTGGAGCAATTT        |
| RCOR2#1        | TCTGTGGCATAAGCACGATG        |
| RCOR2#2        | GCATTTGCCATGGAAGCCAA        |
| SOX4#1         | GCCCGAGTCCGAGCTCTCGC        |
| SOX4#2         | ATTGTTGGTTTGCTGCACCA        |
| SOX11#1        | GCGGATCATGGTGCAGCAGG        |
| SOX11#2        | ATTCATGGCTTGACGCCCCG        |
| KLF12#1        | CGTCCACAACATATCCCGATA       |
| KLF12#2        | ACAGATAACGAGTCCTCCGG        |

**Supplementary Table 5. List of gRNA sequences used for gene KO in hPSC-derived neurons.**
